# Supplementary material for: Study on the growth mechanism of monolayer and few-layer hexagonal boron nitride films on copper foil
Source: Royal Society of Chemistry journal article supplement (doi:10.1039/d4cp01930j), 2024-01-01
Supplement: d4cp01930j1.pdf [file d4cp01930j1.pdf]

## Study on the Growth Mechanism of Monolayer and Few-Layer Hexagonal Boron Nitride Films on Copper Foil

Mingyuan Wang,<sup>\*a</sup> Guiwu Liu,<sup>b</sup> Shuangying Lei,<sup>\*a</sup> and Neng Wan<sup>\*a</sup>

<sup>a</sup>Key Laboratory of MEMS of Ministry of Education, School of Integrated Circuits, Southeast University, Nanjing, 210096, China;

<sup>b</sup>School of Materials Science and Engineering, Jiangsu University, Zhenjiang, 212013, China

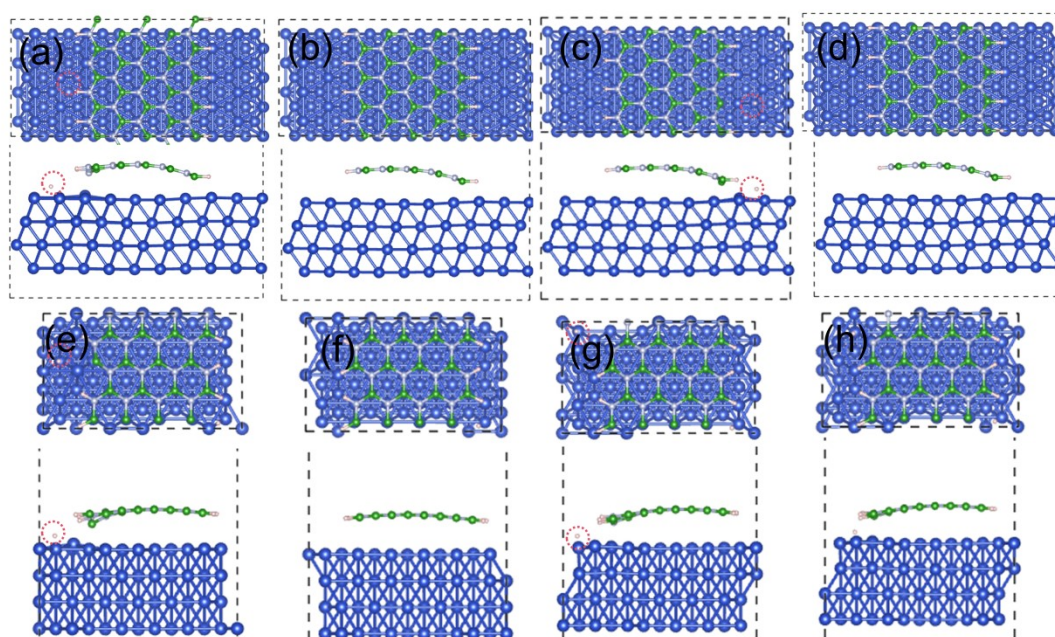

**Fig. S1** Initial and final structures of H atom bond to (a, b) N and (c, d) B atoms at the ZZ edge of h-BN on Cu(111). Initial and final structures of H atom bond to (e, f) B and (g, h) N atoms at the AC edge of h-BN on Cu(111). The green, silvery, white and blue balls represent the B, N, H and Cu atoms, respectively. The red dashed circles represent the diffusion process of the marked atoms.

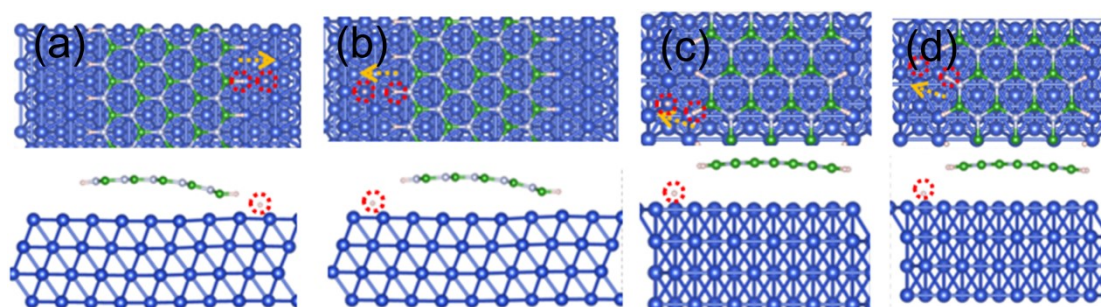

**Fig. S2** (a-d) Schematic diagram for H atom desorption from the B and N atoms for BN-ZZ-H and BN-AC-H. The green, silvery, white and blue balls represent the B, N, H and Cu atoms, respectively. The red dashed circles and yellow arrows represent the diffusion process of the marked atoms.

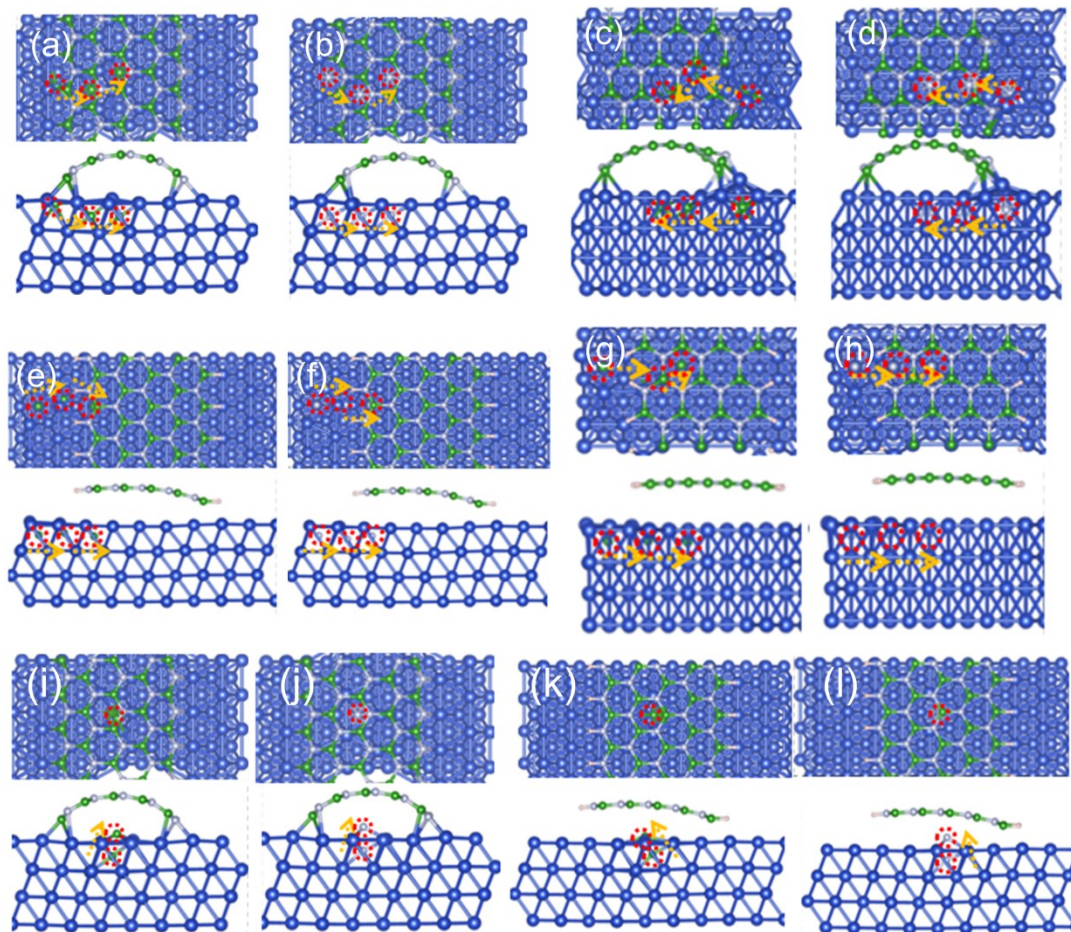

**Fig.S3** (a-h) Diagram for the diffusion of B and N atoms along subsurface for BN-ZZ, BN-AC, BN-ZZ-H and BN-AC-H. (i-l) Diagram for the diffusion of B and N atoms from subsurface to surface for BN-ZZ and BN-ZZ-H. The green, silvery, white and blue balls represent the B, N, H and Cu atoms, respectively. The red dashed circles and yellow arrows represent the diffusion process of the marked atoms.

Table S1 Growth of h-BN on copper substrate under different conditions

| Ref | Substrate                     | Pressure regime        | Growth temperature | Precursor                                                   | Atmosphere                                     | Results                    | Torr                 |
|-----|-------------------------------|------------------------|--------------------|-------------------------------------------------------------|------------------------------------------------|----------------------------|----------------------|
| 1   | Polycrystalline Cu foil       | Atmospheric pressure   | 1000°C             | Ammonia-borane 120–130°C                                    | Ar: H <sub>2</sub> = 170: 30 sccm              | 2–5 layer film             | 760                  |
| 2   | Cu foil                       | Atmospheric pressure   | 1000°C             | Borazine                                                    | H <sub>2</sub> = 2000 sccm                     | 2 to ~20 nm thick film     | 760                  |
| 3   | Polycrystalline Cu foil       | Atmospheric pressure   | 1000°C             | Ammonia-borane, 110–130°C                                   | Ar: H <sub>2</sub> = 80: 20 sccm               | 6–8 layer film             | 760                  |
| 4   | Cu foil                       | ~500 Torr              | 950°C              | Ammonia-borane, 130°C                                       | Ar: H <sub>2</sub> = 300: 50 sccm              | 5-layer                    | 500                  |
| 5   | Cu foil                       | Atmospheric pressure   | 1050°C             | Ammonia-borane, 5 mg, 60°C                                  | Ar: H <sub>2</sub> = 170: 30 sccm              | 1–2.2 nm thick film        | 760                  |
| 6   | Cu (solid and molten Cu on W) | Atmospheric pressure   | 1000°C<br>1100°C   | Ammonia-borane, 110°C                                       | Ar: H <sub>2</sub> = 90: 10 sccm               | 1–10 layers                | 760                  |
| 7   | Polycrystalline Cu foil       | Atmospheric pressure   | 1030°C             | Ammonia-borane, 60–90°C                                     | N <sub>2</sub> : H <sub>2</sub> = 180: 20 sccm | Monolayer film             | 760                  |
| 8   | Cu foil                       | Atmospheric pressure   | 1020°C             | Ammonia-borane, 8.5mg, 80–100 °C                            | Ar: H <sub>2</sub> = 95: 5 sccm                | ~3 nm thick film           | 760                  |
| 9   | Cu foil                       | Atmospheric pressure   | 1030°C             | Ammonia-borane, 80°C                                        | 20-mTorr air and 10-sccm H <sub>2</sub>        | ~3 nm thick film           | 760                  |
| 10  | Cu foil                       | Low pressure           | 1000°C             | Ammonia-borane, 55–120°C                                    | Ar: H <sub>2</sub> = 50: 50 sccm               | Monolayer film             | 0.5                  |
| 11  | Cu foil                       | ~10 <sup>-6</sup> mbar | ~950–1000°C        | Borazine, 1 × 10 <sup>-4</sup> to 5 × 10 <sup>-3</sup> mbar | H <sub>2</sub> (~0.2 mbar)                     | Monolayer films            | 7.5*10 <sup>-7</sup> |
| 12  | Cu foil                       | 350 mTorr              | 1000°C             | Ammonia-borane, 60–90°C                                     | H <sub>2</sub> , 10 sccm (350 mTorr)           | Monolayer film and islands | 0.35                 |
| 13  | Polycrystalline Cu foil       | 30–40 Pa               | 1000°C             | Ammonia-borane, 90–100°C                                    | Ar, 40 sccm                                    | Monolayer film             | 0.3                  |
| 14  | Cu foil                       | 400 mTorr              | 1050°C             | Ammonia-                                                    | H <sub>2</sub> , 100                           | Monolayer                  | 0.4                  |

|    |                                      |                                            |          |                                       |                                          |                            |                      |
|----|--------------------------------------|--------------------------------------------|----------|---------------------------------------|------------------------------------------|----------------------------|----------------------|
|    |                                      |                                            |          | borane, 130°C                         | sccm                                     | film                       |                      |
| 15 | Cu foil                              | 30–40 Pa                                   | 1000°C   | Ammonia-borane, 50, 70, 90, and 110°C | Different ratio of Ar and H <sub>2</sub> | Monolayer film and islands | 0.3                  |
| 16 | Polycrystalline Cu foil              | UHV, base pressure < 10 <sup>-7</sup> mbar | 1000°C   | Ammonia-borane, 15 mg                 | H <sub>2</sub> , 10 sccm                 | Monolayer islands          | 7.5*10 <sup>-8</sup> |
| 17 | Cu foil                              | Low pressure                               | 1050 °C  | Ammonia-borane, 100°C                 | H <sub>2</sub> , 15 sccm                 | Monolayer film             | 0.5                  |
| 18 | Polycrystalline Cu foil              | Low-pressure                               | 1050°C   | Ammonia-borane, 2–3mg, 75–85°C        | H <sub>2</sub> , 40 sccm                 | Monolayer islands          | 0.5                  |
| 19 | Cu foil                              | Low-pressure                               | 1050°C   | Borazine                              | Ar: H <sub>2</sub> = 70: 100 sccm        | Monolayer film             | 0.5                  |
| 20 | single-crystal Cu (110) foil         | low pressure (about 200 Pa)                | 1,035 °C | Ammonia borane 65 °C                  | Ar: H <sub>2</sub> = 5: 45 sccm          | single-crystal monolayer   | 1.5                  |
| 21 | Cu (111) films deposited on sapphire | low-pressure 5.0 torr                      | 1,050 °C | Ammonia borane, roughly 60 mg, 85 °C  | H <sub>2</sub> , 30 sccm                 | single-crystal monolayer   | 5                    |

## REFERENCES

1. L. Song, L. Ci, H. Lu, P. B. Sorokin, C. Jin, J. Ni, A. G. Kvashnin, D. G. Kvashnin, J. Lou, B. I. Yakobson, P. M. Ajayan, *Nano Lett.*, 2010, 10, 3209-3215.
2. K. K. Kim, A. Hsu, X. Jia, S. M. Kim, Y. Shi, M. Hofmann, D. Nezich, J. F. Rodriguez-Nieva, M. Dresselhaus, T. Palacios, J. Kong, *Nano Lett.*, 2012, 12, 161-166.
3. K. H. Lee, H. Shin, J. Lee, I. Lee, G. Kim, J. Choi, S. Kim, *Nano Lett.*, 2012, 12, 714-718.
4. W. Lin, V. W. Brar, D. Jariwala, M. C. Sherrott, W. Tseng, C. Wu, N. Yeh, H. A. Atwater, *Chem. Mater.*, 2017, 29, 4700-4707.
5. R. Y. Tay, X. Wang, S. H. Tsang, G. C. Loh, R. S. Singh, H. Li, G. Mallick, E. H. Tong J. Teo, *Mater. Chem. C*, 2014, 2, 1650-1657.
6. M. H. Khan, Z. Huang, F. Xiao, G. Casillas, Z. Chen, P. J. Molino, H. K. Liu, *Sci. Rep.*, 2015, 5, 7743.
7. K. Sridhara, B. N. Feigelson, J. A. Wollmershauser, J. K. Hite, A. Nath, S. C. Hernández, M. S. Fuhrer, D. K. Gaskill, *Cryst. Growth Des.*, 2017, 17, 1669-1678.
8. J. Fernandes, T. Queirós, J. Rodrigues, S. S. Nemala, A. P. LaGrow, E. Placidi, P. Alpuim, J. B. Nieder, A. Capasso, *FlatChem*, 2022, 33, 100366.
9. W. Lin, P. Zhuang, D. Akinwande, X. Zhang, W. Cai, *Applied Physics Letters* 2019, 115, 073101.
10. X. Song, J. Gao, Y. Nie, T. Gao, J. Sun, D. Ma, Q. Li, Y. Chen, C. Jin, A. Bachmatiuk, M. H. Rummeli, F. Ding, Y. Zhang, Z. Liu, *Nano Res.* 2015, 8, 3164-3176.
11. P. R. Kidambi, R. Blume, J. Kling, J. B. Wagner, C. Baetz, R. S. Weatherup, R. Schloegl, B. C. Bayer, S. Hofmann, *Chem. Mater.*, 2014, 26, 6380-6392.
12. K. K. Kim, A. Hsu, X. Jia, S. M. Kim, Y. Shi, M. Dresselhaus, T. Palacios, J. Kong, *ACS Nano*, 2012,

6, 8583-8590.

13. N. Guo, J. Wei, L. Fan, Y. Jia, D. Liang, H. Zhu, K. Wang, D. Wu, *Nanotechnology*, 2012, 23, 415605.
14. J. Han, J. Lee, H. Kwon, J. Yeo, *Nanotechnology*, 2014, 25, 145604.
15. L. Wang, B. Wu, L. Jiang, J. Chen, Y. Li, W. Guo, P. Hu, Y. Liu, *Adv. Mater.*, 2015, 27, 4858-4864.
16. G. E. Wood, A. J. Marsden, J. J. Mudd, M. Walker, M. Asensio, J. Avila, K. Chen, G. R. Bell, N. R. Wilson, *2D Mater.*, 2015, 2, 025003.
17. Y. Wen, X. Shang, J. Dong, K. Xu, J. He, C. Jiang, *Nanotechnology*, 2015, 26, 275601.
18. D. Zhang, F. Wu, Q. Ying, X. Gao, N. Li, K. Wang, Z. Yin, Y. Cheng, G. Meng, *J. Mater. Chem. C*, 2019, 7, 1871-1879.
19. Q. Wu, J. Park, S. Park, S. J. Jung, H. Suh, N. Park, W. Wongwiriyanpan, S. Lee, Y. H. Lee, Y. J. Song, *Sci. Rep.*, 2015, 5, 16159.
20. L. Wang, X. Xu, L. Zhang, R. Qiao, M. Wu, Z. Wang, S. Zhang, J. Liang, Z. Zhang, Z. Zhang, W. Chen, X. Xie, J. Zong, Y. Shan, Y. Guo, M. Willinger, H. Wu, Q. Li, W. Wang, P. Gao, S. Wu, Y. Zhang, Y. Jiang, D. Yu, E. Wang, X. Bai, Z. Wang, F. Ding, K. Liu, *Nature*, 2019, 570, 91-95.
21. T. Chen, C. Chuu, C. Tseng, C. Wen, H. S. P. Wong, S. Pan, R. Li, T. Chao, W. Chueh, Y. Zhang, Q. Fu, B. I. Yakobson, W. Chang, L. Li, *Nature*, 2020, 579, 219-223.
